# Supplementary material for: A New Method for InSAR Stratified Tropospheric Delay Correction Facilitating Refinement of Coseismic Displacement Fields of Small-to-Moderate Earthquakes
Source: MDPI journal article supplement (doi:10.3390/rs14061425), 2022-03-15
Supplement: s1 [file s1]

Archive with 1 entries (1 files):
- remotesensing-1579524-supplementary.pdf
